# Supplementary material for: Estimating the impact of drug use on US mortality, 1999-2016
Source: PLoS One. 2020 Jan 15;15(1):e0226732. doi: 10.1371/journal.pone.0226732 (PMC6961845; doi:10.1371/journal.pone.0226732)
Supplement: S3 Appendix — (DOCX) [file pone.0226732.s003.docx]

# S3 Appendix. Estimating the drug-associated fraction

The procedure described in the main text for estimating the fraction of other deaths associated with drug use is equivalent to implementing the following formula:

, (3)

where (our estimated values of are given in Table 1). Thus, the coefficient in this expression, , includes the main coefficient of in Eq. 2 as well as the interactions between and age. When is positive, lies between 0 and 1. Yet, at some of the oldest ages, is negative (Table 1), which suggests a substitution effect (i.e., higher levels of drug-coded mortality are associated with lower levels of “other” drug-associated mortality). Such a substitution effect could result from interstate variation in reporting (e.g., medical examiners/physicians in some states may be more reluctant than in those in other states to ascribe a death to drugs). Since drug-coded mortality is highest in midlife, we focus most of our analysis on the age range 15-64, where is positive (in the model that includes both drugs and smoking).[[1]](#footnote-1)

Finally, the overall drug-associated fraction for deaths from all causes is a weighted average:

(4)

where , *,* and represent the observed number of drug-coded deaths, number of deaths from other causes of death except those coded to drug use or lung cancer, and deaths from all causes combined, respectively.

###

1. In cases where was negative in the model that includes both drugs and smoking, the value of (representing the reduction in other deaths as a result of drug use) was between -0.02 and zero in 98.7% of cases. The only cases where was less than -0.05 occurred in Alaska among women aged 85+ in 1999; men aged 85+ in 2003 & 2012; and men aged 80-84 in 2008. The lowest value of was -0.086 among Alaskan men aged 85+ in 2012. [↑](#footnote-ref-1)
